# Supplementary material for: Sampling through time and phylodynamic inference with coalescent and birth–death models
Source: PubMed Central journal article supplement (PMC4223917; doi:10.1098/rsif.2014.0945), 2014-12-06

# Estimated birth rate

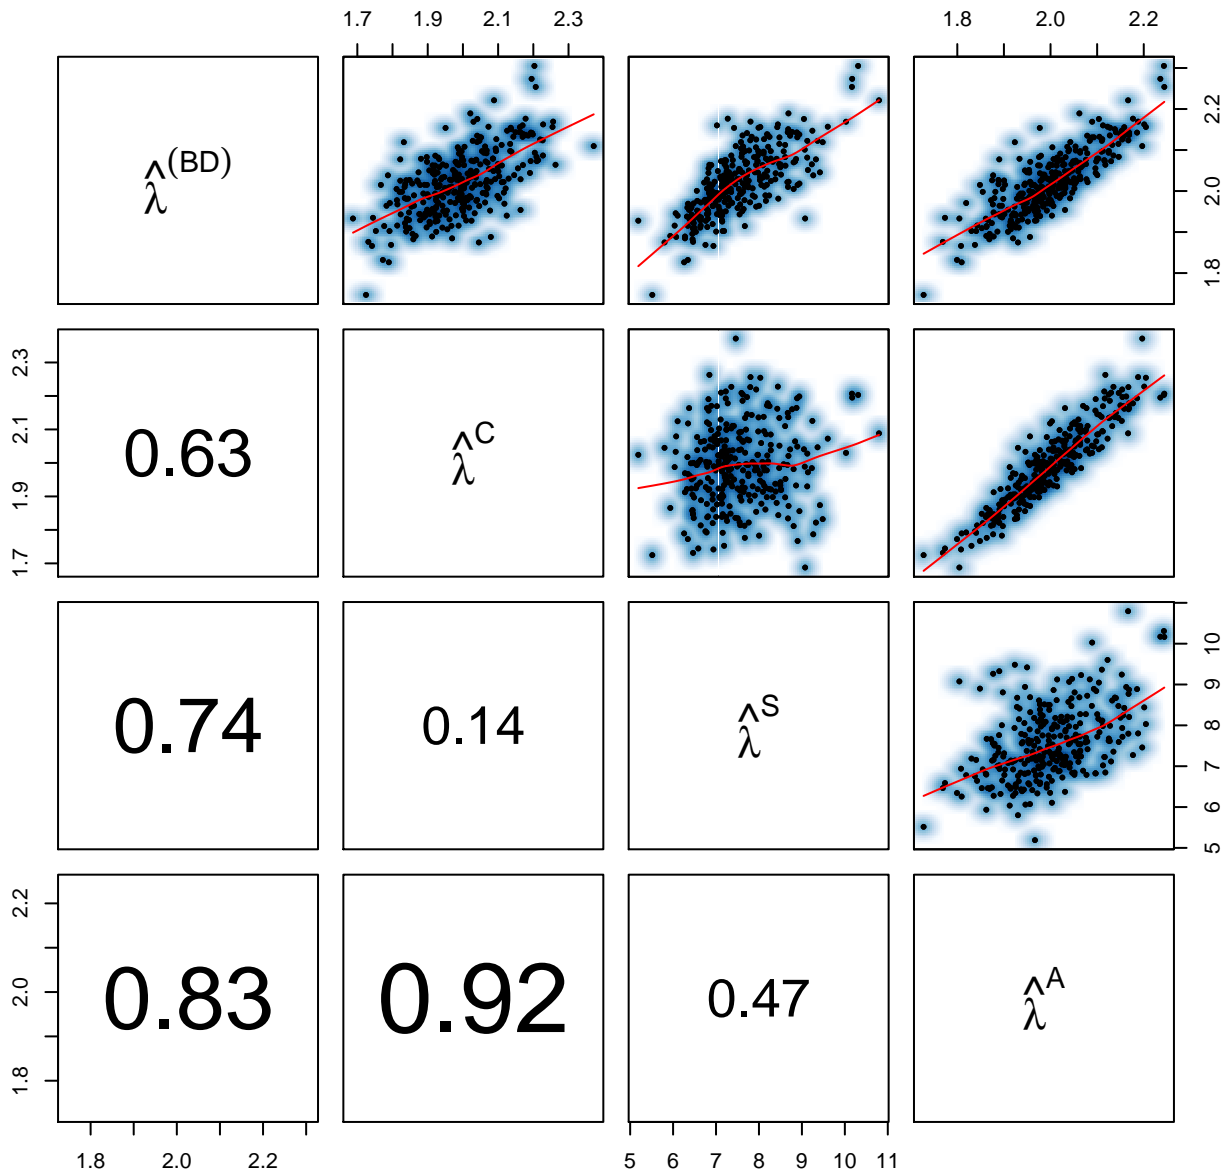

Supplement: rsif20140945supp1.pdf [file rsif20140945supp1.pdf]
